# Supplementary material
Source: publisher figshare collection journal article supplement (https://acs.figshare.com/ndownloader/files/4795378)
Supplement: Supplementary file 1 [file 4795378]

# Biomass gasification using carbon dioxide: Effect of temperature, CO<sub>2</sub>/C ratio and the study of reactions influencing the process

Narendra Sadhwani <sup>a, b</sup>, Sushil Adhikari <sup>b, ‡</sup> and Mario R. Eden <sup>a</sup>

<sup>a</sup>Department of Chemical Engineering, <sup>b</sup>Department of Biosystems Engineering, Auburn University, Auburn, AL 36849, USA

## Table S1: Calculations for minimum fluidization velocity:

Ergun's correlation for pressure drop per unit length across packed of solid particles is shown in equation [A.1].

$$\frac{\Delta P}{L} = \frac{150 (1-\varepsilon)^2}{\phi^2 \varepsilon^2} \frac{\mu u}{dp^2} + \frac{1.75(1-\varepsilon)u^2 \rho_g}{\varepsilon^3 \phi dp} \quad [A.1]$$

where,  $\varepsilon$  is the void fraction (porosity),  $\phi$  is the sphericity of the bed solids,  $\mu$  is the dynamic viscosity, and  $\rho_g$  the gas density. However, when the particle of bed fluidizes, the drag forces equal the buoyancy of the particle, thus the drag force is given by [A.2]

$$F_D = \Delta P A = AL (1 - \varepsilon)(\rho_p - \rho_g)g \quad [A.2]$$

These equations are solved simultaneously to obtain the minimum fluidization velocity,  $U_{mf}$ , as defined in equation [A.3]:

$$Re_{mf} = [C_1^2 - C_2 Ar]^{0.5} - C_1 \quad [A.3]$$

$$Ar = \frac{\rho_g (\rho_p - \rho_g) g dp^3}{\mu^2} \quad [A.4]$$

The values of  $C_1$  and  $C_2$  have been approximated in literature<sup>38</sup> over a wide range of fluid properties and particle sizes and the equation is written as:

$$Re_{mf} = [33.7^2 + 0.0408 Ar]^{0.5} - 33.7 \quad [A.5]$$

For sand ( $\rho_p = 2776 \text{ kg/m}^3$  & mean particle size  $dp = 263 \text{ }\mu\text{m}$ ), the minimum fluidization velocity was found out to be  $0.0636 \text{ m/s}$ .

## Table S2: Intra particle mass transfer limitation calculations:

Thiele modulus ( $\phi$ ) is the measurement of reaction rate with respect to the rate of diffusion. Lower values of  $\phi$  (less than 0.3) imply that the rate of diffusion is high and the process is kinetically controlled

---

<sup>‡</sup> Corresponding author. Tel: +1 334 844 3543; fax: +1 334 844 3530  
Email address: [sushil.adhikari@auburn.edu](mailto:sushil.adhikari@auburn.edu) (S. Adhikari)

whereas higher values imply that the system shows mass transfer resistance. Simplifying, the value of  $\phi$  can be calculated using equation [B.1].

$$\phi = \frac{d_p}{6} \sqrt{\frac{R_{obs}}{De_{CO_2}}} \quad [B.1]$$

where  $d_p$  = particle diameter,  $R_{obs}$  = observed reaction rate, and  $De$  = effective diffusivity which is calculated using equation [B.2].

$$De = \frac{D_{CO_2} \phi_p \sigma_c}{\tau} \quad [B.2]$$

Where  $\phi_p$  = particle porosity calculated to be 0.32,  $\sigma_c$  = Constriction factor and  $\tau$  = tortuosity. The value of  $R_{obs}$  is calculated using the specific reaction rate obtained from a study by Van Dan Aarsen, et al. as mentioned in Appendix A. The calculated values of  $De$  and  $R_{obs}$  are plugged in equation [B.1] to yield the value of  $\phi = 0.106$ . This implies that the process is kinetically controlled and the influence of mass transfer can be neglected.

### Table S3: Heat transfer limitations between bulk phase and particle

A heat balance between the particle and surrounding medium at the particle surface can be written as:

$$h * A_p * (T - T_s) = \Delta H * R_r \quad [C.1]$$

Where  $h$  is the heat transfer coefficient ( $W/m^2K$ ),  $A_p$  is the surface area of the particle ( $m^2$ ),  $T$  and  $T_s$  are the temperatures (K) of the surrounding medium and the particle respectively,  $\Delta H$  is the heat of reaction ( $kJ/mol$ ) taking place inside the particle and  $R_r$  is the rate of reaction ( $mol/s$ ). The value of  $h$  is determined using the correlation [C.2]:

$$Nu = 0.3 Re^{1.3} \quad [C.2]$$

Parameters in this study:

$d_p$  (biomass) =  $315 \times 10^{-6}$  m;  $u$  = 0.11 m/s; Viscosity =  $1.76 \times 10^{-5}$  Pa s;  $\rho_g$  =  $1.251 \text{ kg/m}^3$ ;  $K$  =  $0.024 \text{ W/mK}$

The value of  $h$  obtained from this correlation =  $76.4 \text{ W/m}^2K$

Due to presence of multiple reactions in the current process,  $\Delta H$  and  $R_r$  cannot be specified. Considering Boudouard reaction,  $\Delta H = 172 \text{ kJ/mol}$ . Van Dan Aarsen, et al.<sup>26</sup> studied the char –  $CO_2$  gasification in a fluidized bed and reported the following values at  $815^\circ C$ :

$R''$  (specific reaction rate) =  $75.9 \times 10^{-6} (\text{mol/m}^2\text{s})$ ;  $S_o$  (specific surface area) =  $1.05 \times 10^8 (\text{m}^2/\text{m}^3)$ . Equation [C.1] becomes:

$$h * A_p * (T - T_s) = \Delta H * R'' * S_o * V_p \quad [C.3]$$

From the above correlation, the value of  $(T - T_s)$  obtained = 1.1. Therefore, the bulk temperature of the particle has to be corrected by  $1.1^\circ C$
